# Supplementary material
Source: PubMed Central journal article supplement (PMC5736804)
Supplement: IAI.00644-17_zii999092266s1.pdf [file IAI.00644-17_zii999092266s1.pdf]

# Supplemental Data.

## Identifying parameters of host cell vulnerability during *Salmonella* infection by quantitative image analysis and modeling

Jakub Voznica<sup>1,2,3</sup>, Christophe Gardella<sup>4,5</sup>, Ilia Belotserkovsky<sup>6</sup>, Alexandre Dufour<sup>2</sup>, Jost Enninga<sup>1</sup>, Virginie Stévenin<sup>1\*</sup>

<sup>1</sup>*Institut Pasteur, Dynamics of Host-Pathogen Interactions Unit, 25 rue du Dr. Roux, 75724 Paris, France*

<sup>2</sup>*Institut Pasteur, BioImage Analysis Unit, 25 rue du Dr. Roux, 75724 Paris, France*

<sup>3</sup>*Ecole Normale Supérieure de Cachan, Université Paris-Saclay, 61 avenue du Président Wilson, 94235 Cachan, France*

<sup>4</sup>*Laboratoire de Physique Statistique, CNRS, UPMC and Ecole Normale Supérieure, 24, rue Lhomond, 75005 Paris, France*

<sup>5</sup>*Institut de la Vision, INSERM and UPMC, 17 rue Moreau, 75012 Paris, France*

<sup>6</sup>*Institut Pasteur, Molecular Microbial Pathogenesis Unit, 25 rue du Dr. Roux, 75724 Paris, France*

\*For correspondence:

Virginie Stévenin

[virginie.stevenin@ens-cachan.fr](mailto:virginie.stevenin@ens-cachan.fr)

**Running title:**

Cell vulnerability during *Salmonella* infection

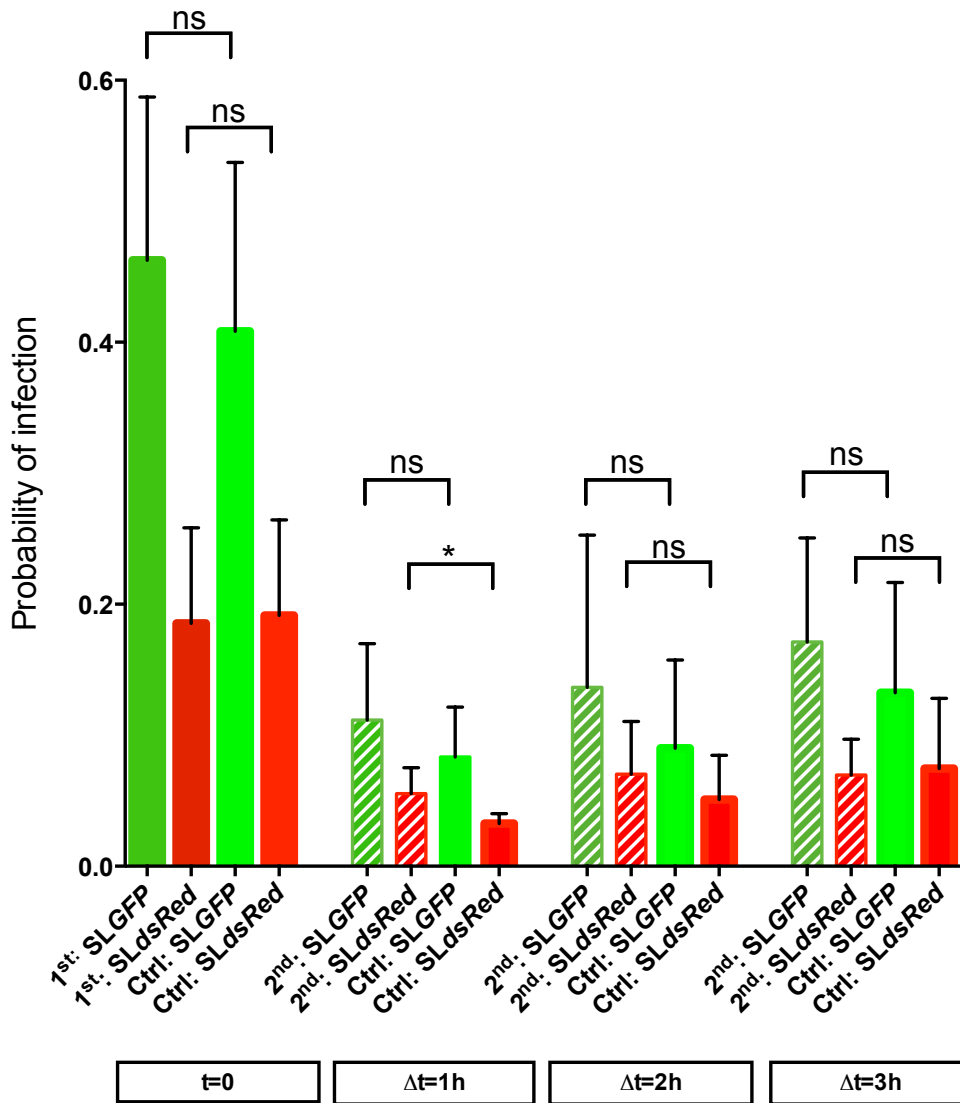

**Fig.S1.** Probability of SL<sub>GFP</sub> and SL<sub>dsRed</sub> infections at different time-points after the beginning of cell challenge (t=0) between single (control) or sequential infections.

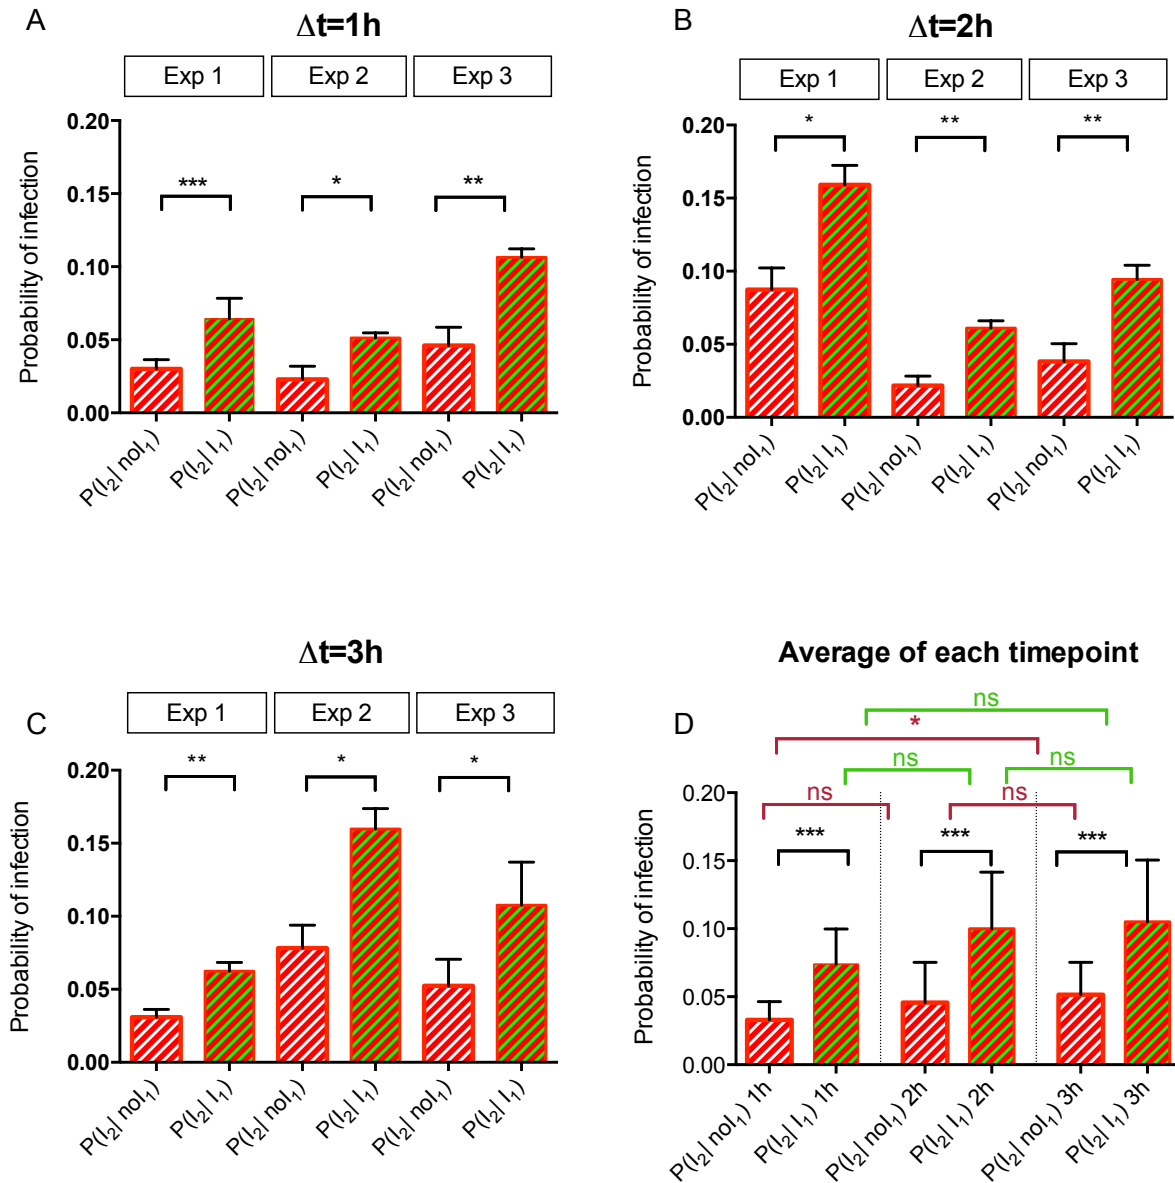

**Fig.S2. A.B.C.** Detailed depiction of the conditional probability of infection for two different populations during sequential infection with a delay of 1 h (**A**), 2 h (**B**) and 3 h (**C**) for each independent experiment with 3 replicates per experiment. P-values were obtained after paired t-test. **D.** Representation of the results from **A**, **B** and **C** after averaging them for each delay. P-values were obtained after paired t-test. The P-values in black resulted from a t-test comparing  $P(I_2 | I_1)$  and  $P(I_2 | noI_1)$ . The P-values in red resulted from a t-test comparing  $P(I_2 | noI_1)$  for 1 h versus 2 h and 2 h versus 3 h. The P-values in green resulted from a t-test comparing  $P(I_2 | I_1)$  for 1 h versus 2 h and 2 h versus 3 h.

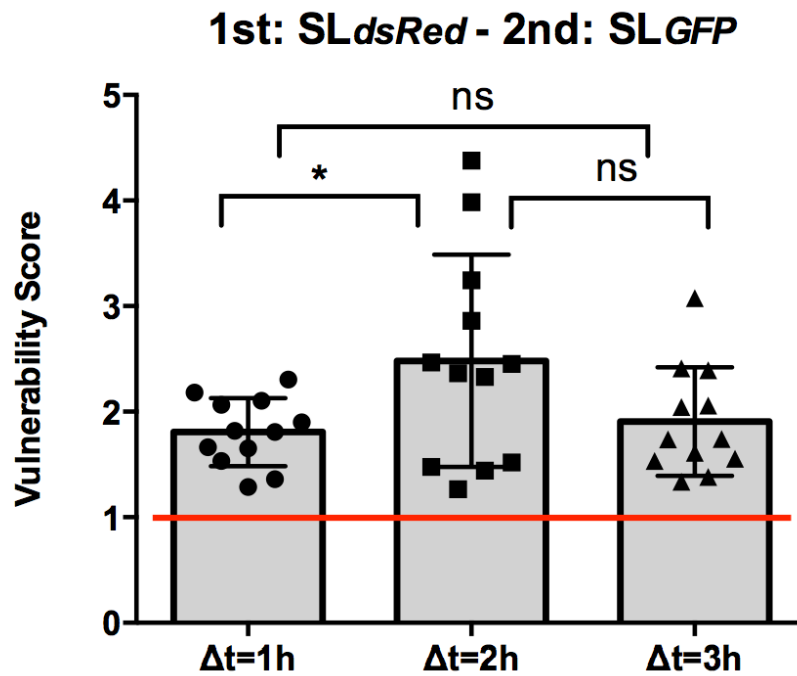

**Fig.S3.** Vulnerability scores for the inverted infections compared to **Fig.2C** (SL<sub>dsRed</sub> before SL<sub>GFP</sub>) with a delay of 1, 2 and 3 h between infections. The red line corresponds to  $P(I_2 | I_1) = P(I_2 | \text{no}I_1) = 1$  indicating the independence of the infections  $I_2$  and  $I_1$ . Values above the red line correspond to  $P(I_2 | I_1) > P(I_2 | \text{no}I_1)$  indicating a cooperation between infections. Values below the red line correspond to  $P(I_2 | I_1) < P(I_2 | \text{no}I_1)$  indicating a competition between infections. Results were obtained from 3 independent experiments per time-point, and P-values were obtained after unpaired t-test.

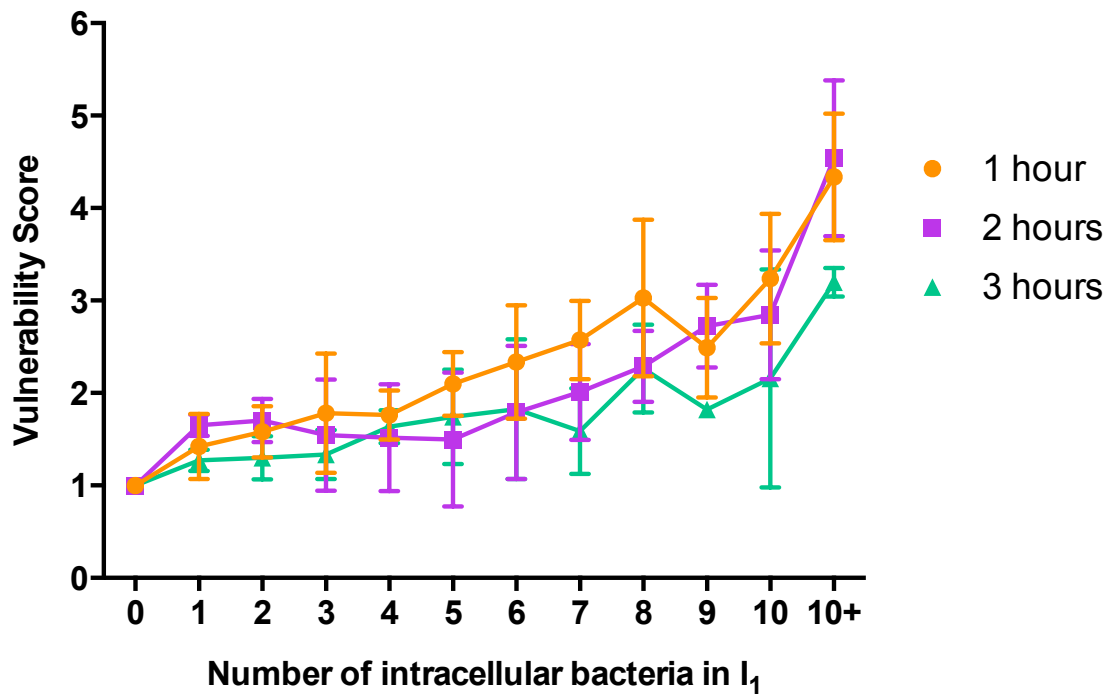

**Fig.S4.** Vulnerability score as a function of the number of intracellular bacteria resulting from the 1<sup>st</sup> infection with a delay of 1, 2 and 3 h between the infections. Results were obtained from 3 independent experiments per time-point.

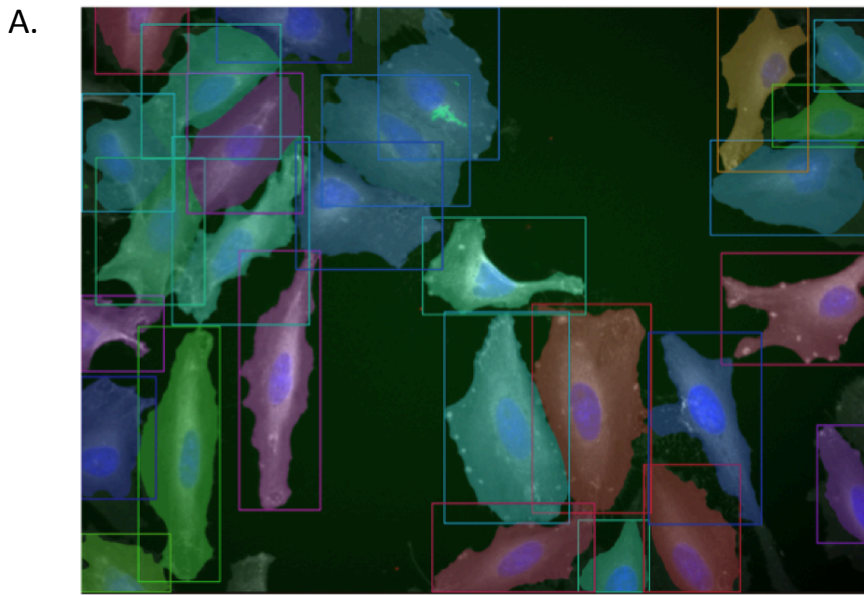

Icy automated cell detection

B. HeLa

| Correlations                | 2nd Infection | Load of Infection | Infected neighbor cells | Non-infected neighbor cells | Neighbor cells | Local cell density | Cell perimeter | vCircularity | Delay |
|-----------------------------|---------------|-------------------|-------------------------|-----------------------------|----------------|--------------------|----------------|--------------|-------|
| 2nd Infection               |               |                   |                         |                             |                |                    |                |              |       |
| Load of Infection           | 0.15          |                   |                         |                             |                |                    |                |              |       |
| Infected neighbor cells     | 0.07          | 0.27              |                         |                             |                |                    |                |              |       |
| Non-infected neighbor cells | -0.01         | -0.12             | -0.07                   |                             |                |                    |                |              |       |
| Neighbor cells              | 0.04          | 0.12              | 0.72                    | 0.64                        |                |                    |                |              |       |
| Local cell density          | 0.02          | 0.16              | 0.52                    | 0.05                        | 0.43           |                    |                |              |       |
| Cell perimeter              | 0.05          | -0.06             | 0.05                    | 0.33                        | 0.26           | -0.36              |                |              |       |
| vCircularity                | -0.03         | 0.05              | -0.01                   | -0.09                       | -0.06          | 0.28               | -0.68          |              |       |
| Delay                       | 0.02          | -0.09             | -0.27                   | 0.07                        | -0.16          | -0.21              | 0.06           | -0.02        |       |

C. Caco-2

| Correlations                | 2nd Infection | Load of Infection | Infected neighbor cells | Non-infected neighbor cells | Neighbor cells | Local cell density | Cell perimeter | Circularity | Replicate |
|-----------------------------|---------------|-------------------|-------------------------|-----------------------------|----------------|--------------------|----------------|-------------|-----------|
| 2nd Infection               |               |                   |                         |                             |                |                    |                |             |           |
| Load of Infection           | 0.08          |                   |                         |                             |                |                    |                |             |           |
| Infected neighbor cells     | 0.11          | 0.40              |                         |                             |                |                    |                |             |           |
| Non-infected neighbor cells | 0.07          | -0.10             | -0.20                   |                             |                |                    |                |             |           |
| Neighbor cells              | 0.12          | 0.12              | 0.34                    | 0.85                        |                |                    |                |             |           |
| Local cell density          | -0.13         | -0.02             | 0.00                    | 0.03                        | 0.03           |                    |                |             |           |
| Cell perimeter              | 0.21          | 0.16              | 0.21                    | 0.42                        | 0.52           | -0.37              |                |             |           |
| Circularity                 | -0.15         | -0.13             | -0.22                   | -0.36                       | -0.46          | 0.13               | -0.57          |             |           |
| Replicate                   | 0.00          | 0.04              | 0.13                    | -0.12                       | -0.05          | 0.36               | -0.27          | 0.12        |           |

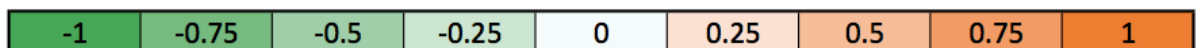

**Fig.S5.** Cell parameter correlations. **A.** Illustration of Icy cell segmentation using *Active Contours* (see *Materials and Methods for plugins detail*). **B-C.** Table of the correlations between the different cell parameters for HeLa (**B**) and Caco-2 (**C**) cells.

# HeLa

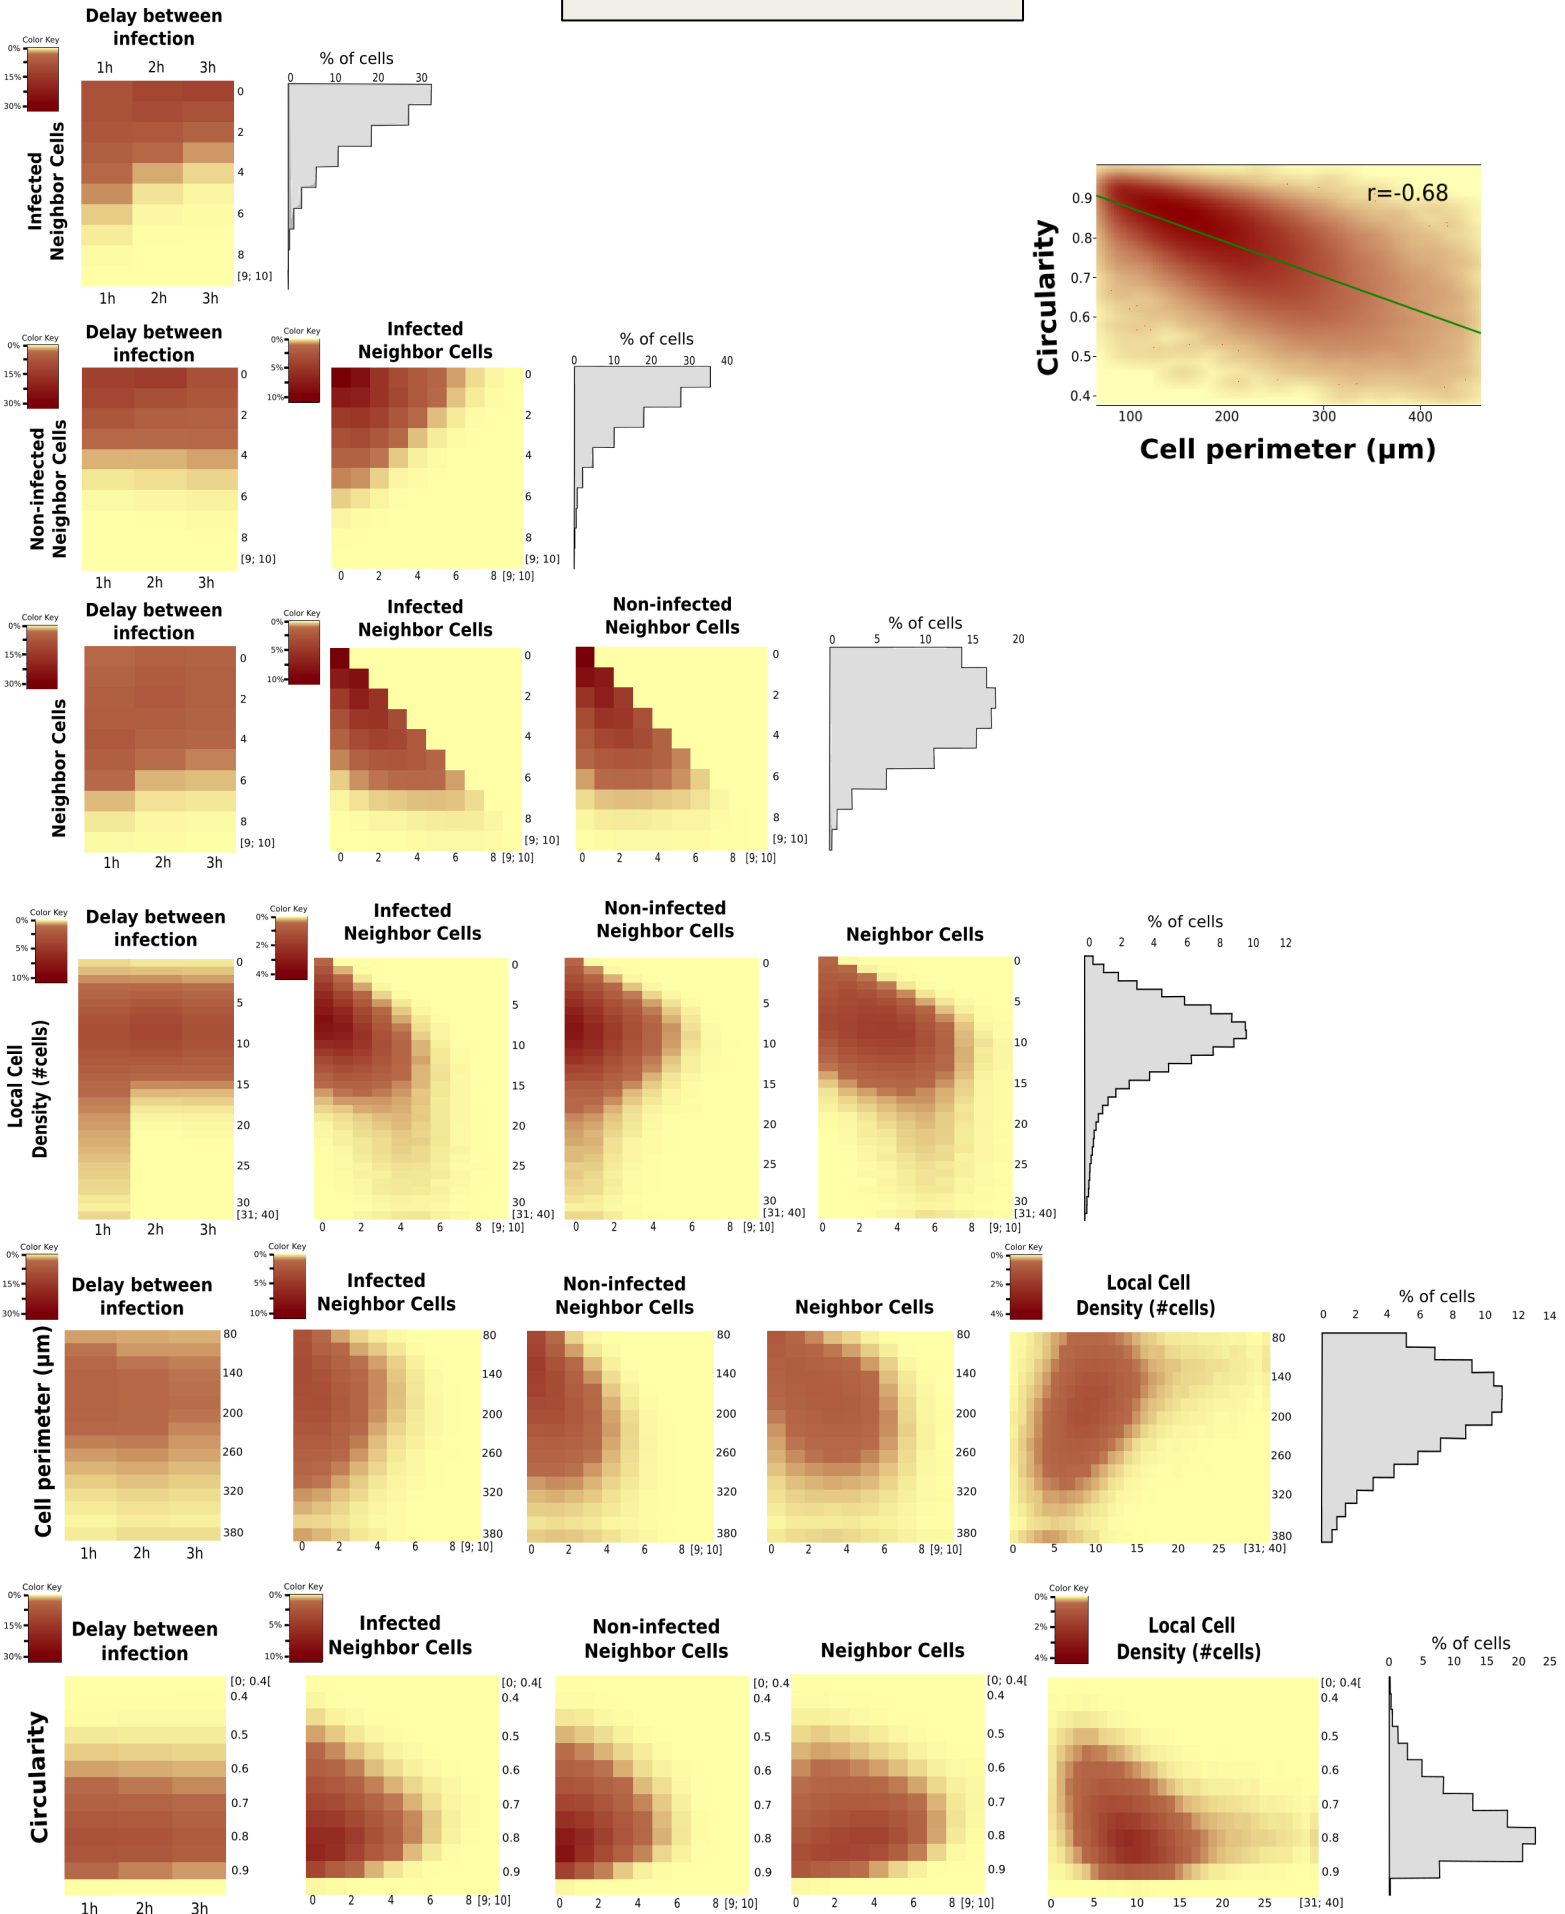

**Fig.S6.** Scatter plot and heat-map of the different cell parameters studied in HeLa cells model allowing to evaluate the relation between these parameters. Grey histograms represent the distribution of the vertical axis parameter in the entire cell population.

# Caco-2

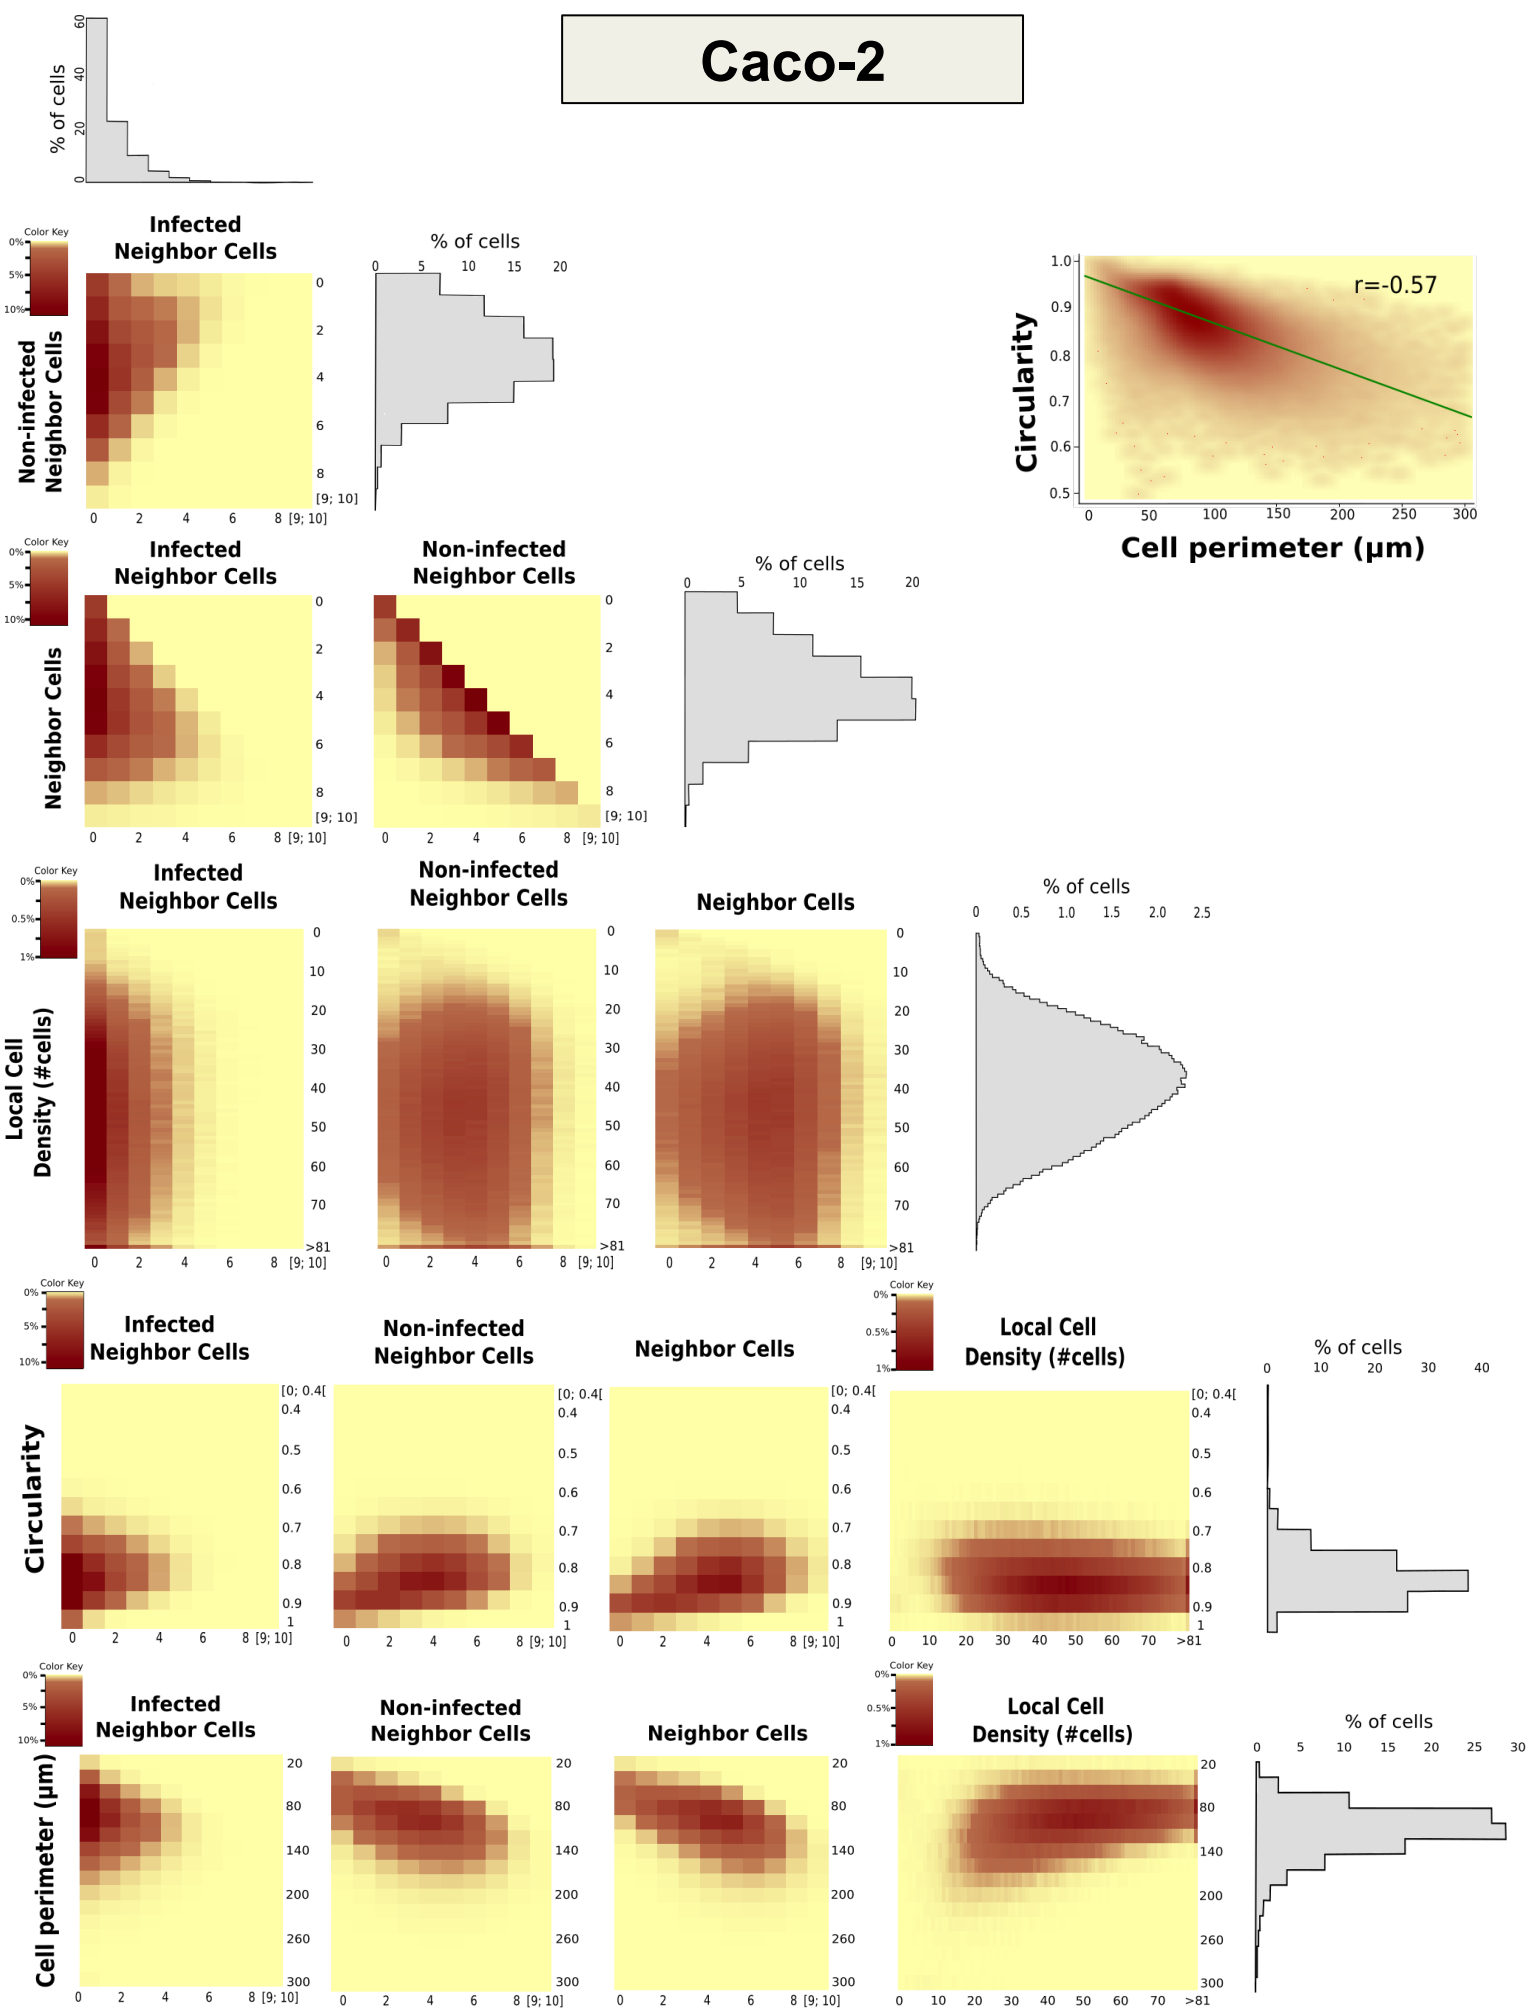

**Fig.S7.** Scatter plot and heat-map of the different cell parameters studied in Caco-2 cells model allowing to evaluate the relation between these parameters. Grey histograms represent the distribution of the parameter in the entire cell population.



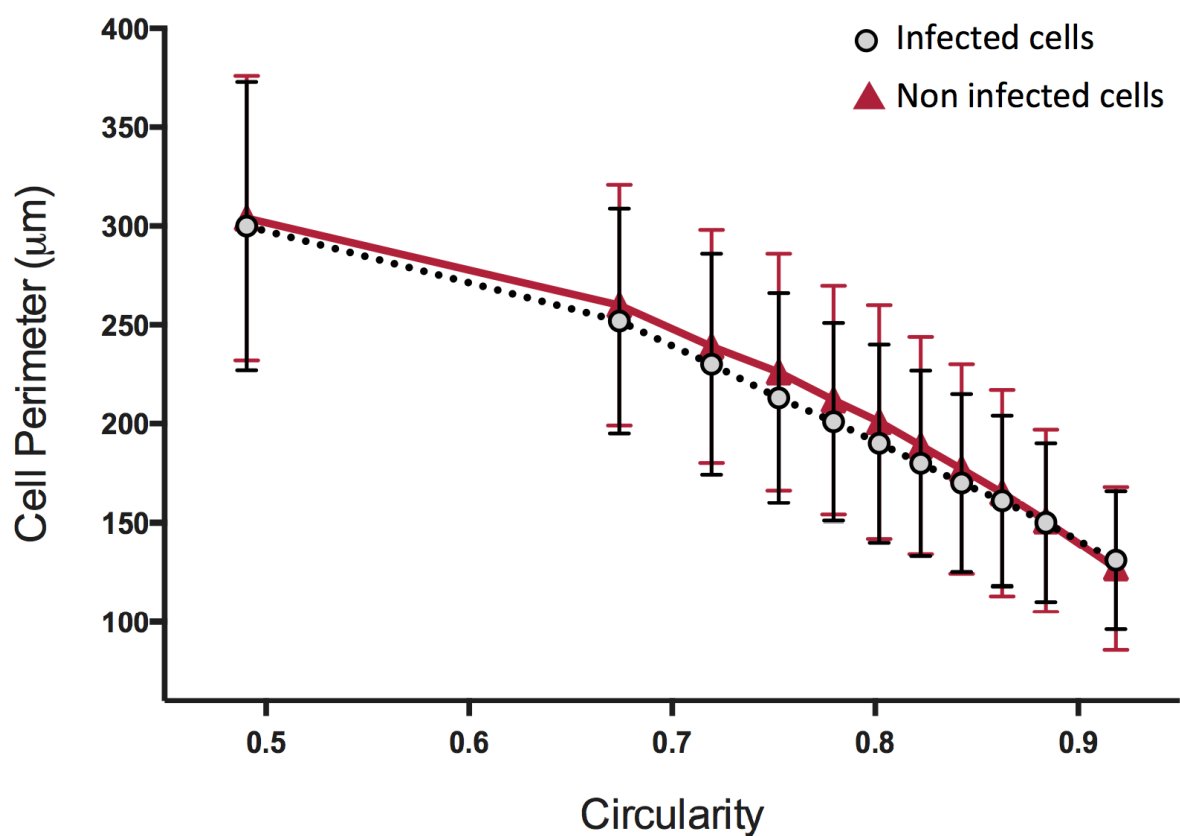

**Fig.S8.** Investigation of the impact of the first infection on the morphological and local cellular parameters. We selected the cell perimeter as a parameter associated with HeLa cell vulnerability, and the cell circularity as another that was not associated such that both parameters correlate together (correlation coefficient: -0.68). We show the distribution of perimeter values for given values of circularity in infected or non-infected cells. The values for circularity are divided in 11 bins containing the same number of cells, and the values for the perimeter is average for each circularity bin. This analysis was performed on the full dataset (more than 115 000 cells). The comparison of the perimeter of infected versus non-infected cells for groups of different circularity did not show any significant difference. The cell parameters associated with cell vulnerability are not induced by infection.

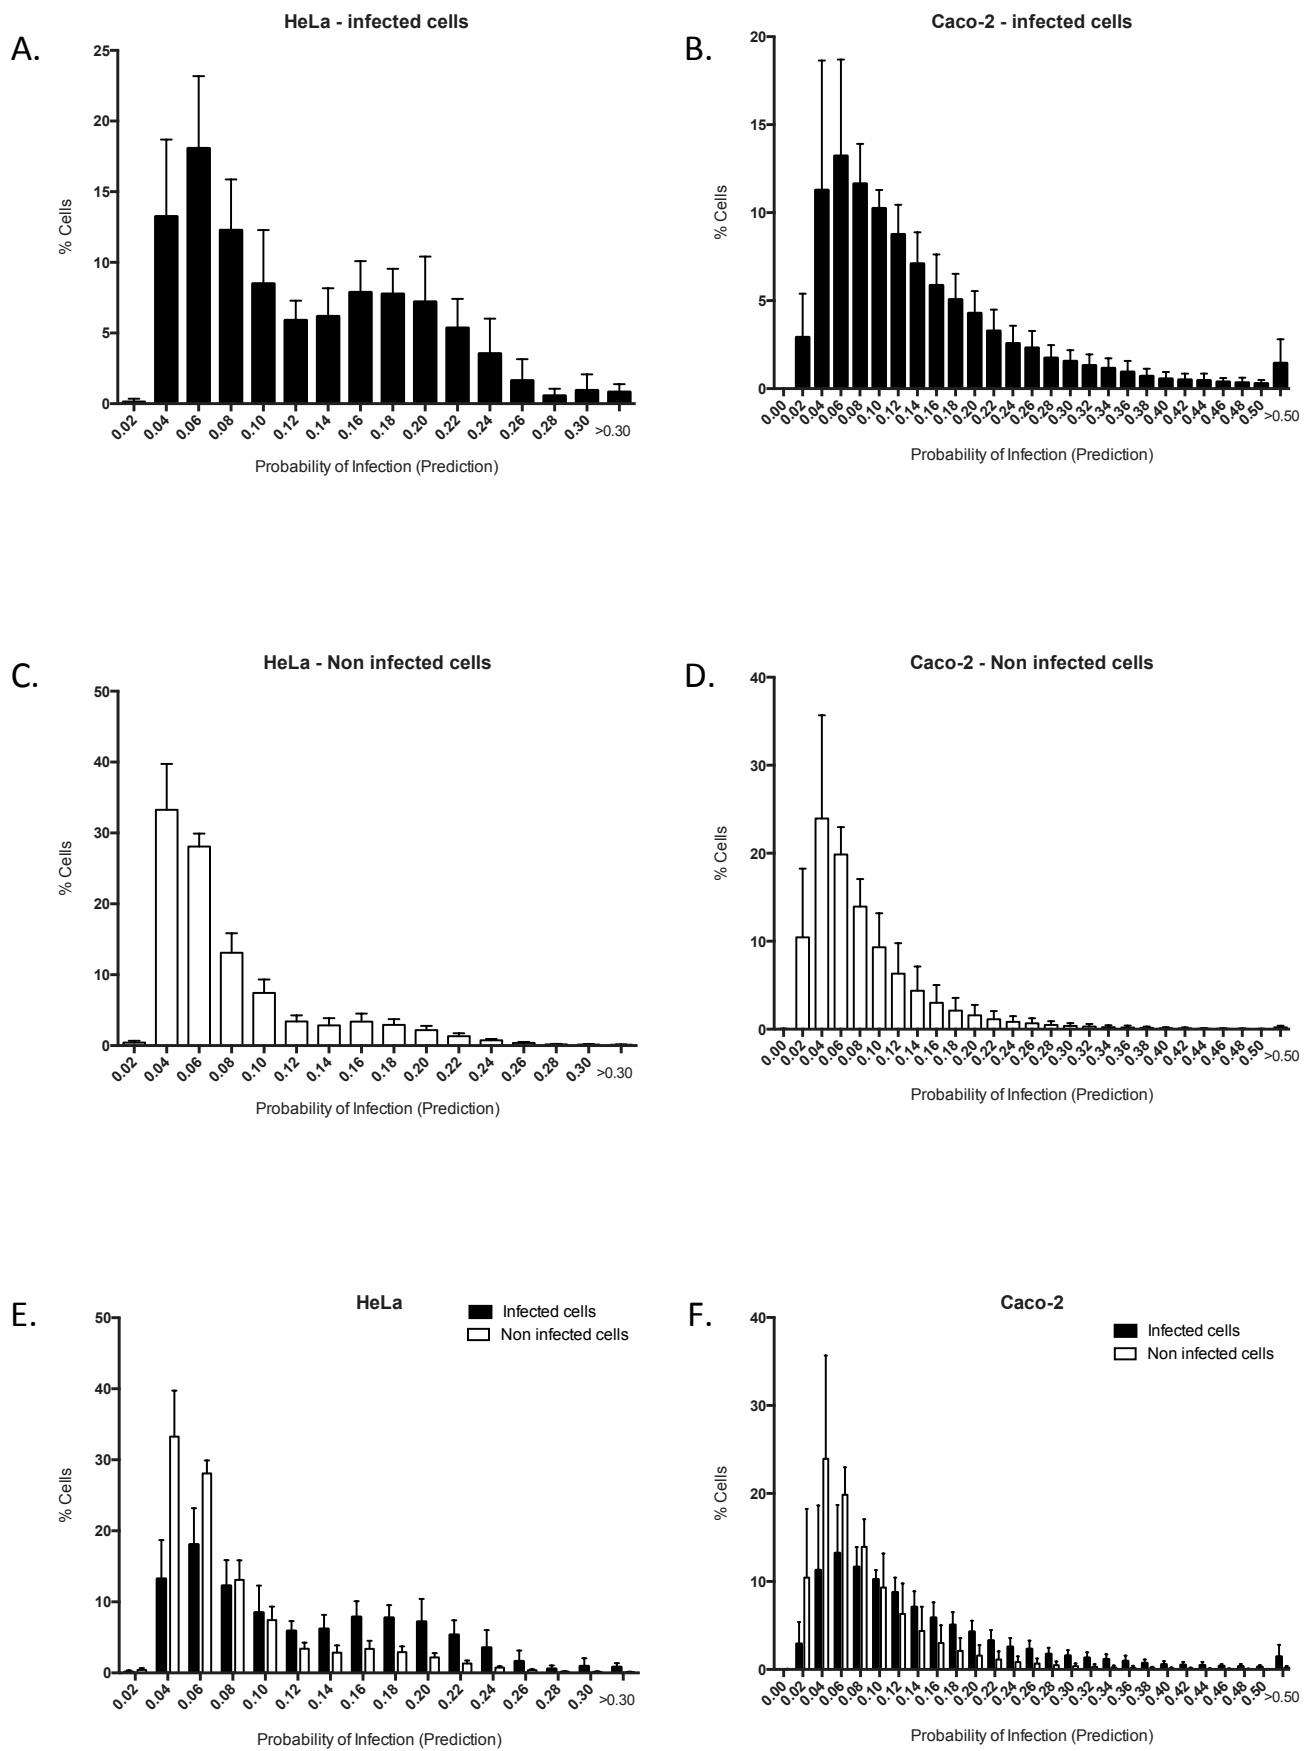

**Fig.S9.** Distribution of the predicted probability of infection at single-cell level for infected and non infected cells. **A-C-E.** HeLa cells. **B-D-F.** Caco-2 cells.

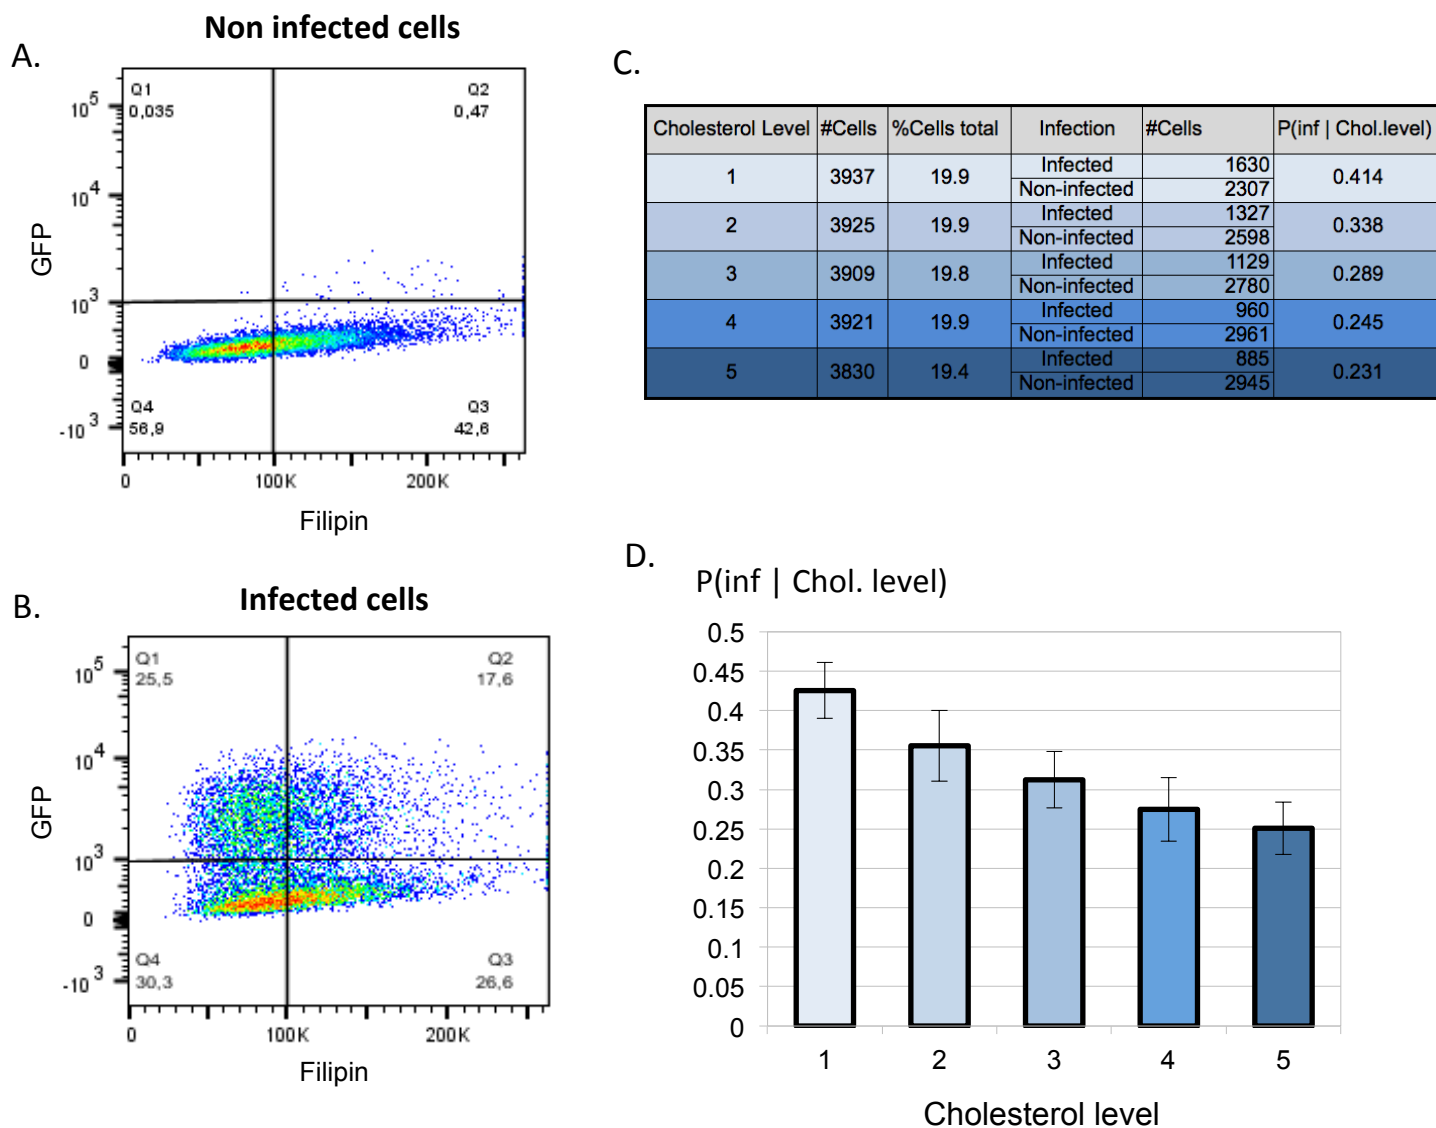

**Fig.S10.** Illustration of FACS acquisition and data processing. **A-B.** Heat map of Filipin fluorescence as measure of the host cholesterol level (horizontal axe) and GFP fluorescence representing Salmonella-GFP infection (vertical axe). The dials [Q1,Q2] and [Q3,Q4] correspond to the non-infected (**A**) and the infected cells respectively (**B**). **C.** Raw data obtained after binning of the total cell population in 5 categories of cholesterol level (from the lowest to the highest) containing approximately the same number of cell (column 1 to 4). Conditional probability of infection for each category of cholesterol level based on the raw data (5<sup>th</sup> column). **D.** Representation of the conditional probability of infection for each category of cholesterol level.

| <b>Cell line: HeLa</b>      | Coefficient | Standard Error | Difference of LogLikelihood | p-value on difference of LogLikelihood |
|-----------------------------|-------------|----------------|-----------------------------|----------------------------------------|
| Intercept                   | -4.231      | 0.169          |                             |                                        |
| Low 1st Infection           | 0.385       | 0.033          | 97.725                      | 5.99E-52                               |
| Medium 1st Infection        | 0.765       | 0.031          |                             |                                        |
| High 1st Infection          | 1.461       | 0.0322         |                             |                                        |
| Infected neighbor cells     | 0.055       | 0.009          | 1.941                       | 2.01E-18                               |
| Non-infected neighbor cells | -0.053      | 0.01           | 1.25                        | 1.10E-09                               |
| Local cell density          | 0.018       | 0.003          | 1.752                       | 6.07E-16                               |
| Cell perimeter              | 0.004       | 0.000          | 11.409                      | 9.27E-38                               |
| Circularity                 | 0.198       | 0.167          | -0.008                      | 8.89E-01                               |
| Delay-2h                    | 0.155       | 0.029          | 5.332                       | 1.57E-33                               |
| Delay-3h                    | 0.304       | 0.03           |                             |                                        |

**Table.S1.** Model coefficient values for HeLa cells with the corresponding standard error for each cell parameter. Difference of log-likelihood obtained after subtraction of the log-likelihood of the model including all parameters from the log-likelihood of a model ignoring one parameter (see graphic representation in **Fig.5B**). The presented values were averaged with the values obtained over 100 training/testing circles for each model. P-values were obtained after paired t-test.

| <b>Cell line: Caco-2</b>    | Coefficient | Standard Error | Difference of LogLikelihood | p-value on difference of LogLikelihood |
|-----------------------------|-------------|----------------|-----------------------------|----------------------------------------|
| Intercept                   | -0.48       | 0.14           |                             |                                        |
| Low 1st Infection           | 0.25        | 0.02           | 7.07                        | 2.29E-30                               |
| Medium 1st Infection        | 0.23        | 0.03           |                             |                                        |
| High 1st Infection          | 0.20        | 0.06           |                             |                                        |
| Infected neighbor cells     | 0.23        | 0.01           | 55.69                       | 3.28E-77                               |
| Non-infected neighbor cells | 0.09        | 0.00           | 20.71                       | 7.75E-58                               |
| Local cell density          | -0.02       | 0.00           | 86.25                       | 6.70E-82                               |
| Cell perimeter              | 0.01        | 0.00           | 70.56                       | 2.52E-78                               |
| Circularity                 | -2.96       | 0.14           | 22.83                       | 1.26E-53                               |

**Table.S2.** Model coefficient values for Caco-2 cells with the corresponding standard error for each cell parameter. Difference of log-likelihood obtained after subtraction of the log-likelihood of the model including all parameters from the log-likelihood of a model ignoring one parameter (see graphic representation in **Fig.5B**). The presented values were averaged with the values obtained over 100 training/testing circles for each model. P-values were obtained after paired t-test.

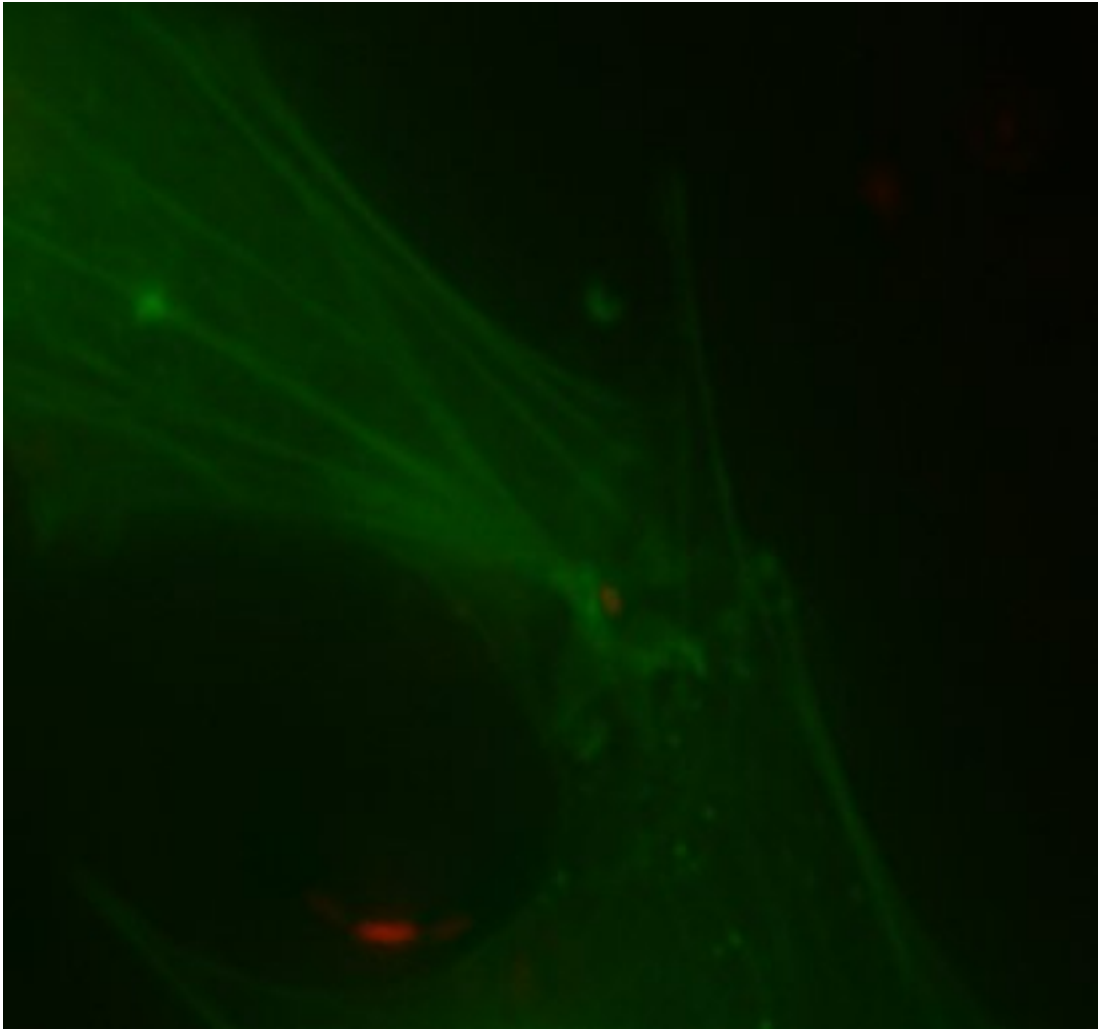

**Still image - Movie.S1.** (see *MovieS1.avi* file) Ruffle appearance and disappearance after entry of single salmonellae in a host cell. Time intervals between the frames are 3 min. The green channel corresponds to actin-GFP transfected cells and shows the membrane ruffles. The red channel shows salmonellae SL<sub>dsRed</sub>.

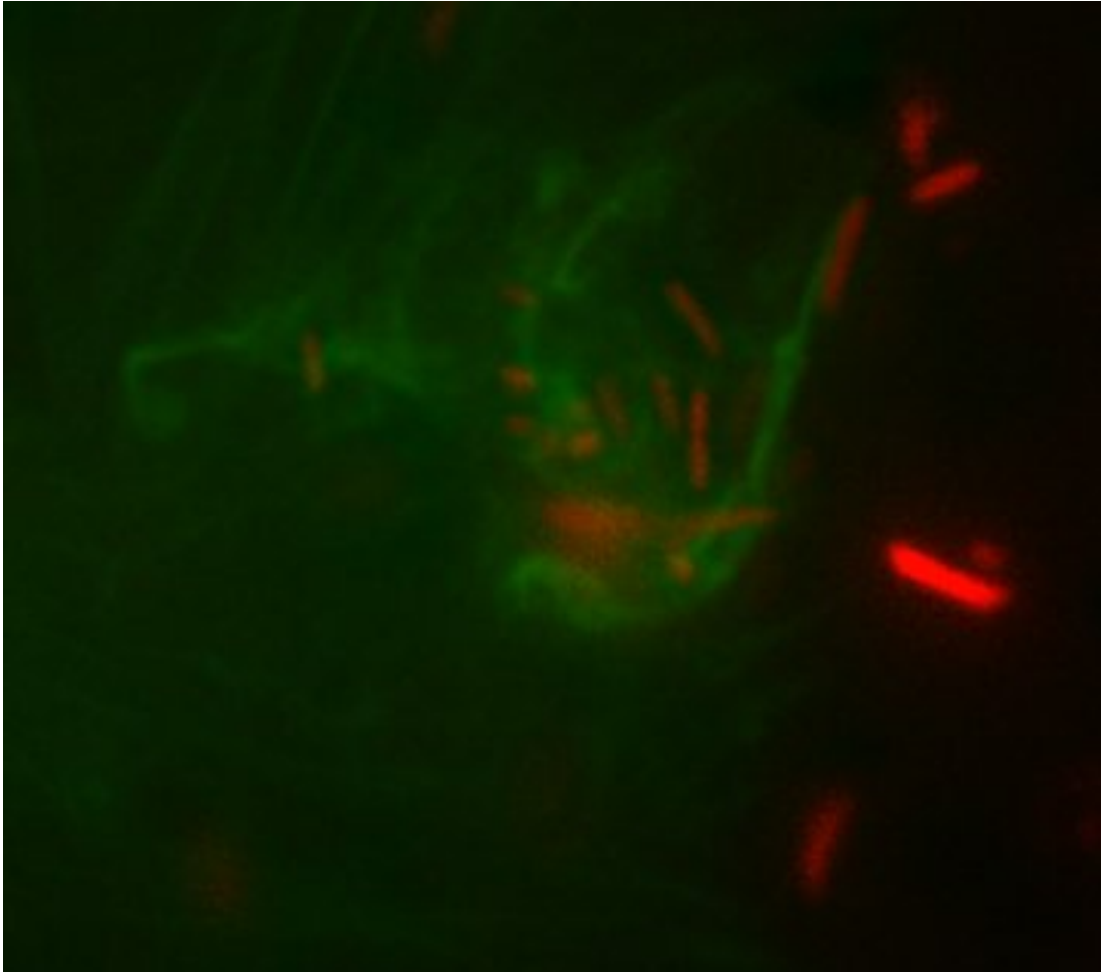

**Still image - Movie.S2.** (see *MovieS2.avi* file) Ruffle appearance and disappearance after entry of multiple salmonellae in a host cell. Time intervals between the frames are 3 min. The green channel corresponds to actin-GFP transfected cells and shows the membrane ruffles. The red channel shows salmonellae SL<sub>dsRed</sub>.
